# Supplementary material for: Low-temperature Raman spectroscopy of sodium-pump rhodopsin from Indibacter alkaliphilus: insight of Na+ binding for active Na+ transport
Source: Royal Society of Chemistry journal article supplement (doi:10.1039/d0cp05652a), 2020-12-29
Supplement: d0cp05652a1.pdf [file d0cp05652a1.pdf]

## Low-temperature Raman spectroscopy of sodium-pump rhodopsin from *Indibacter alkaliphilus*: Insight of Na<sup>+</sup> binding for active Na<sup>+</sup> transport

Yushi Nakamizo<sup>1</sup>, Tomotsumi Fujisawa<sup>1\*</sup>, Takashi Kikukawa<sup>2,3</sup>, Akiko Okamura<sup>2</sup>, Hiroaki Baba<sup>1</sup>, Masashi Unno<sup>1\*</sup>

<sup>1</sup> Department of Chemistry and Applied Chemistry, Faculty of Science and Engineering, Saga University, Saga 840-8502, Japan

<sup>2</sup> Faculty of Advanced Life Science, Hokkaido University, Sapporo 060-0810, Japan

<sup>3</sup> Global Station for Soft Matter, Global Institution for Collaborative Research and Education, Hokkaido University, Sapporo 060-0810, Japan

### **Supporting Information**

Figure S1: Temperature dependence of extinction and Raman spectra of wild-type *IaNaR*

Figure S2: Extinction spectra of D101N, D115N, R108Q, and D250N mutants of *IaNaR*

Figure S3: Raman spectra of wild-type *IaNaR* at 80K in the presence of NaCl, KCl, and choline Cl.

Figure S4: Extinction spectra of wild-type *IaNaR* in the presence of KCl and choline Cl

Figure S5: Recovery of Raman spectrum of WT<sub>K</sub> by adding NaCl

Figure S6: Raman spectra of *IaNaR* at 80K in the presence of N-methyl-D-glucamine hydrochloride

Figure S7: Raman spectra of D101N mutant of *IaNaR* at 80K in the presence of NaCl and choline Cl.

Figure S8: Raman spectra of D115N mutant of *IaNaR* at 80K

Figure S9: Raman spectra of *IaNaR* mutants at 80K

Figure S10: Cation dependent thermal stability of *IaNaR*

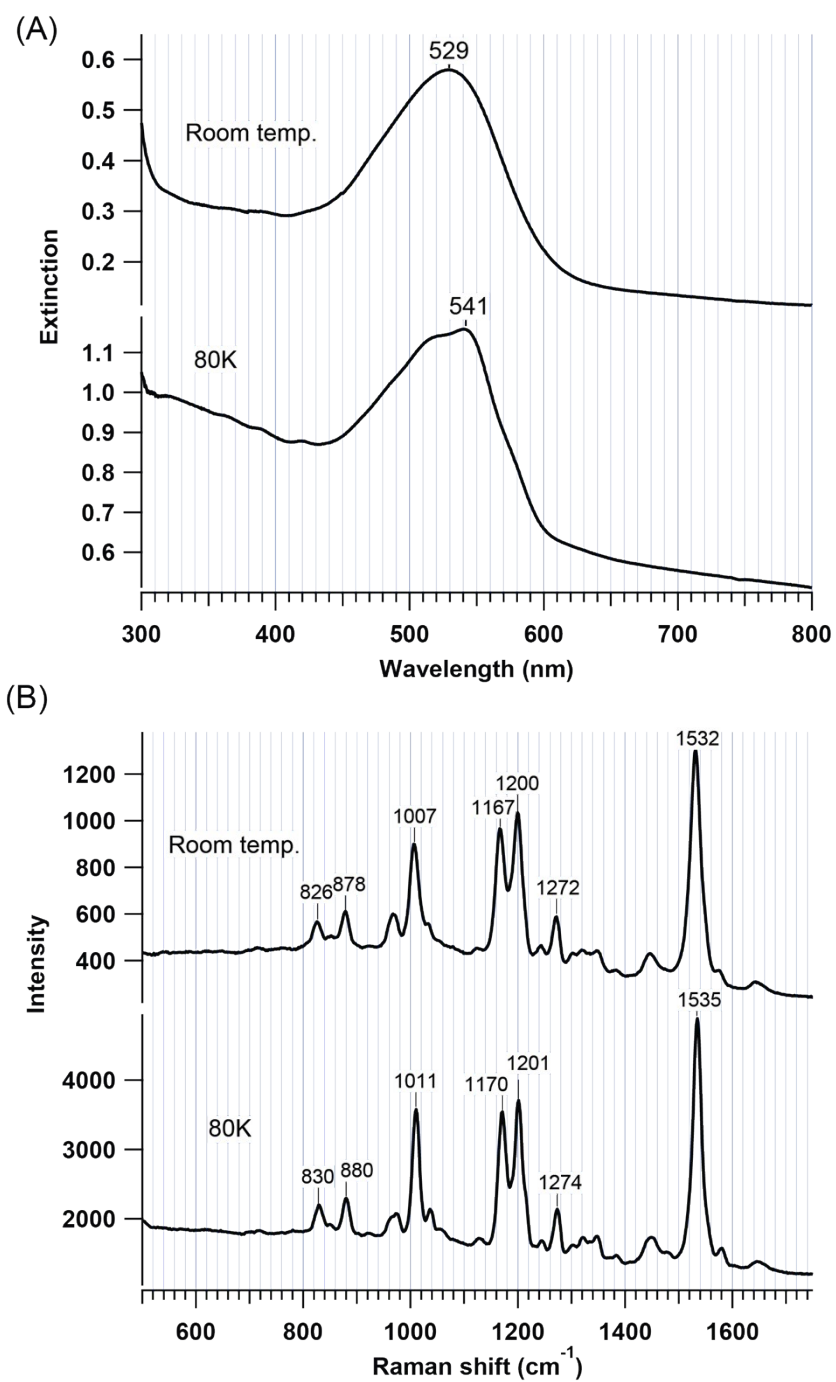

**Figure S1.** (A) Extinction and (B) Raman spectra of wild-type *IaNaR* with NaCl at room temperature and 80K

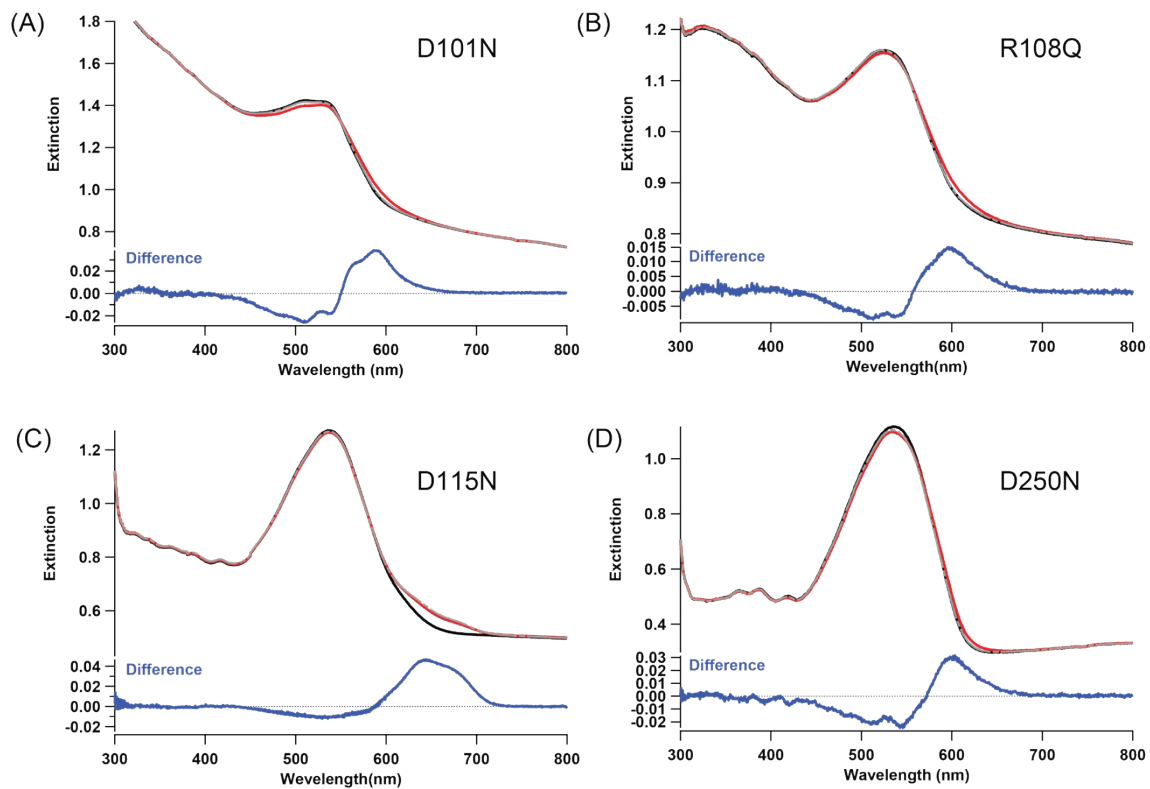

**Figure S2.** Extinction spectra of *IaNAR* mutants of (A) D101N, (B) R108Q, (C) D115N, and (D) D250N at 80K. The samples were prepared at pH 8.0 with NaCl. Black: unphotolyzed state, red: after green-LED excitation, grey: after subsequent red-LED excitation, blue: difference between the spectrum of unphotolyzed state and that after green-light excitation.

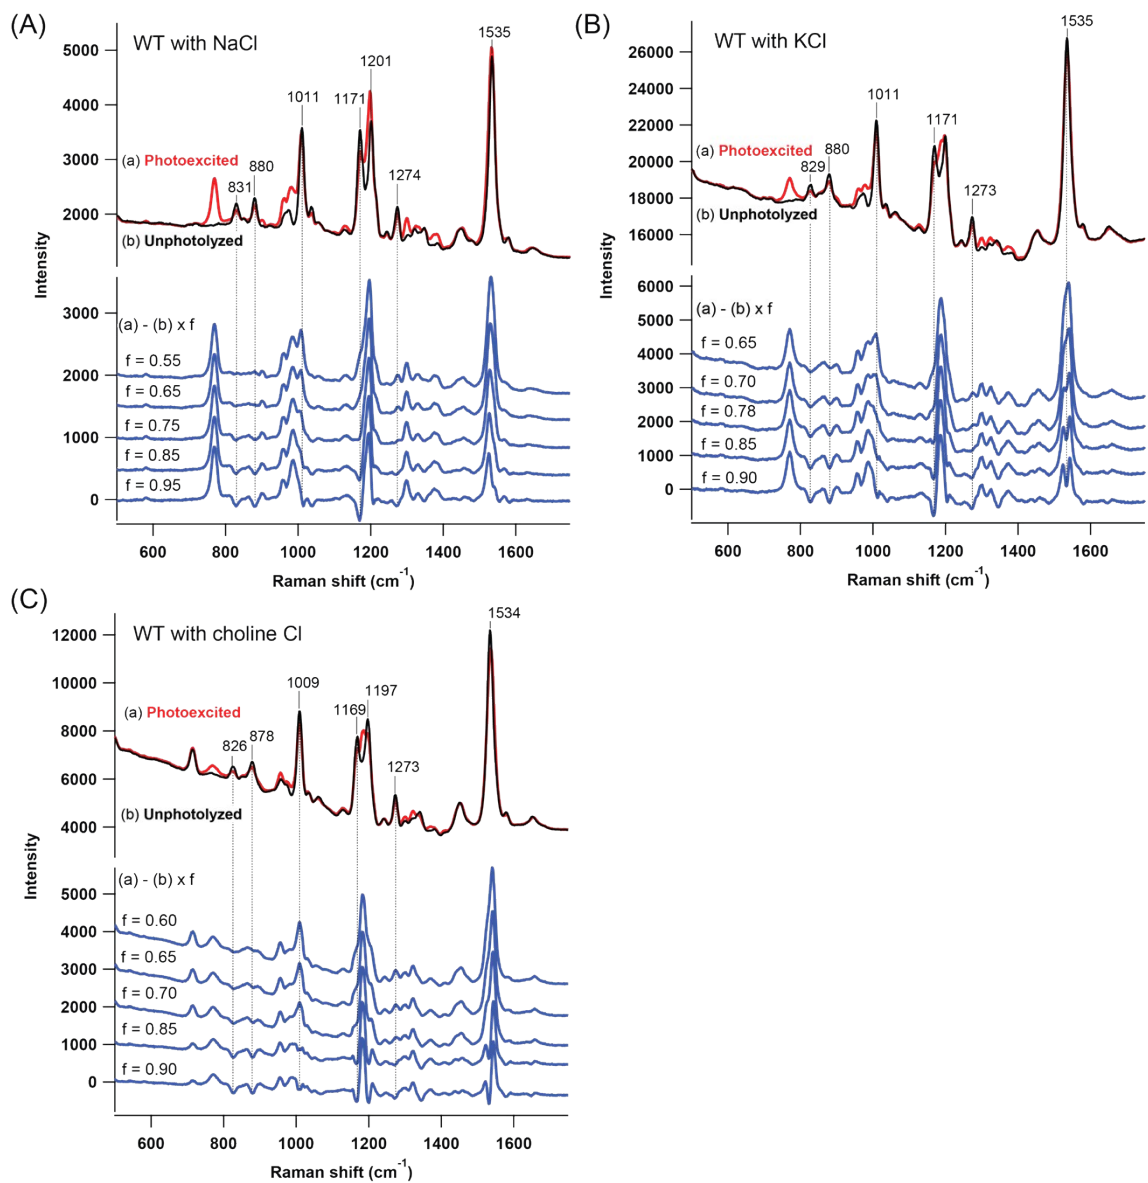

**Figure S3.** Raman spectra of wild-type *IaNaR* at 80K in the presence of (A) NaCl, (B) KCl, and (C) choline Cl. (a) after green-LED excitation, (b) unphotolyzed state. Difference spectra are obtained as  $(a) - (b) \times f$  with  $f$  being the scaling factor, and shown in blue.  $f=0.65$ ,  $0.70$ , and  $0.70$  are employed for the K-intermediate spectra with NaCl, KCl, and choline Cl, respectively.

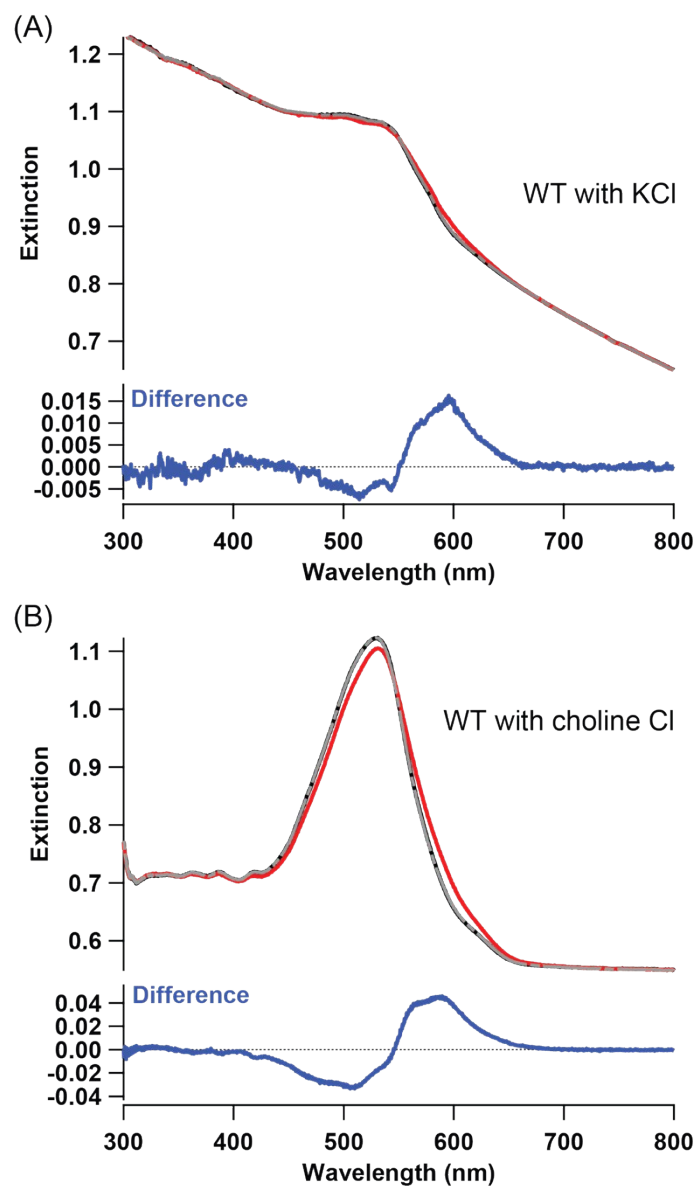

**Figure S4.** Extinction spectra of wild-type *IaNaR* at 80K in presence of (A) KCl and (B) choline Cl. The samples were prepared at pH 8.0. Black: unphotolyzed state, red: after green-LED excitation, grey: after subsequent red-LED excitation, blue: difference between the spectrum of unphotolyzed state and that after green-light excitation.

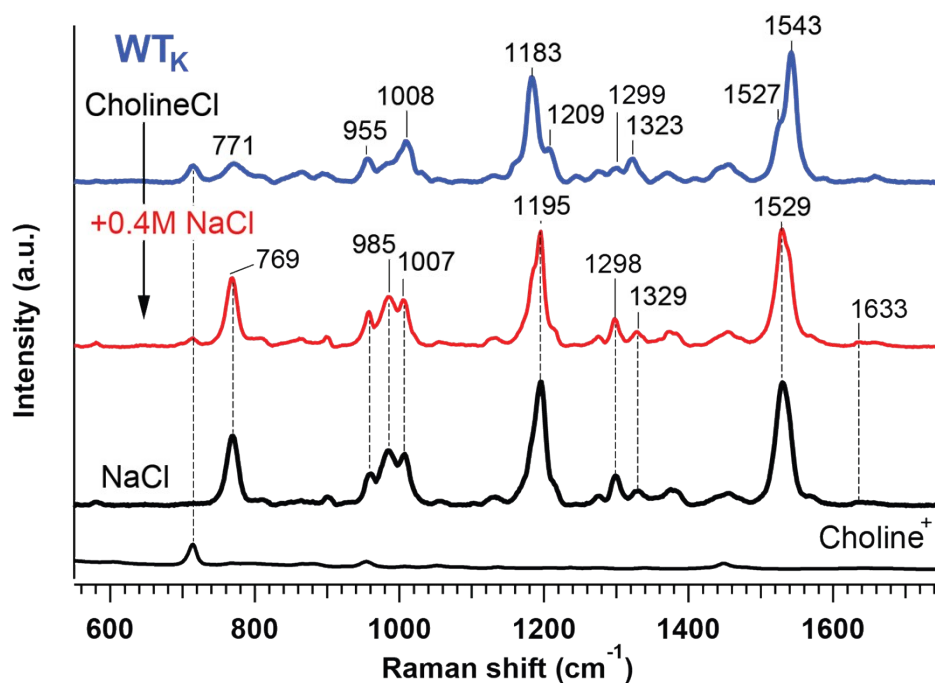

**Figure S5.** Raman spectrum of K intermediate of wild-type *IaNaR* (WT<sub>K</sub>) when adding NaCl to the sample prepared with choline Cl. Blue: obtained from sample film prepared with choline Cl, red: after adding a few drops of 0.4M NaCl solution to the sample film. For comparison, Raman spectrum of WT<sub>K</sub> obtained from the sample prepared with NaCl, and Raman spectrum of choline Cl are shown in black.

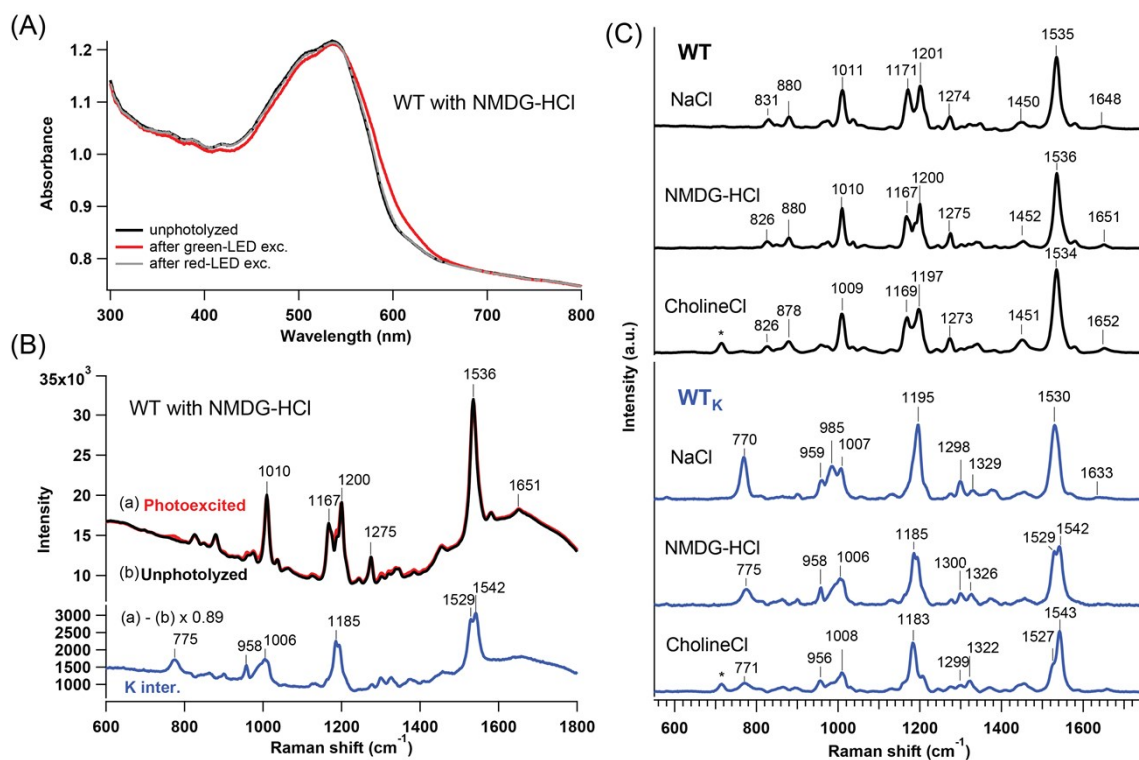

**Figure S6.** (A) Absorption spectra of wild-type *IaNAR* (WT) at 80K in the presence of N-methyl-D-glucamine hydrochloride (NMDG-HCl); (black) unphotolyzed state, (red) after green-LED excitation, (gray) after subsequent red-LED excitation. (B) Raman spectra of WT at 80K in the presence of NMDG-HCl, (black) unphotolyzed state, (red) after green-LED excitation, (blue) K intermediate. (C) Comparison of Raman spectra of WT in the presence of NMDG-HCl, NaCl and choline Cl; (black) unphotolyzed state, (blue) K intermediate.

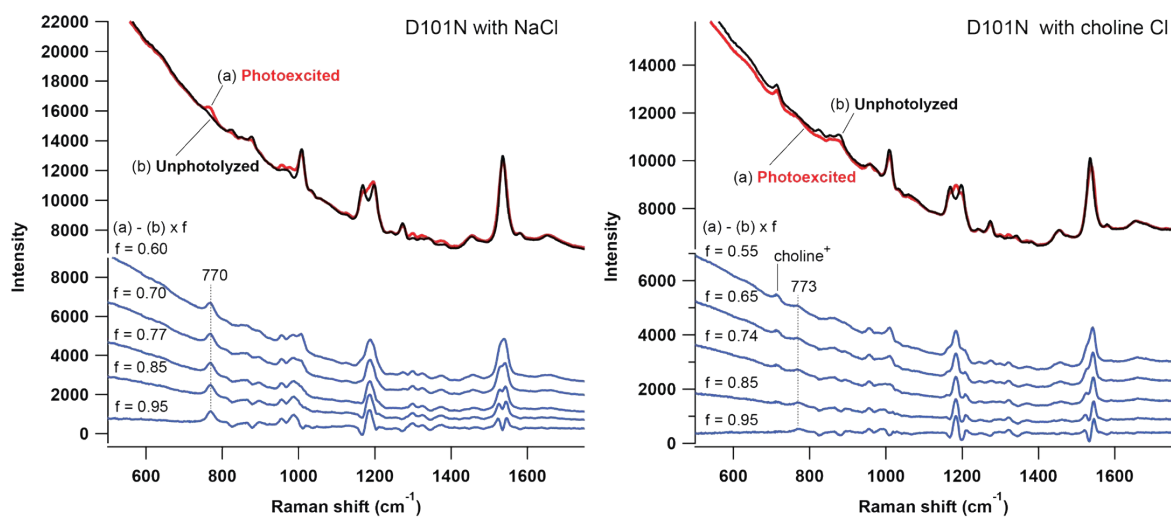

**Figure S7.** Raman spectra of D101N at 80K in the presence of (left) NaCl and (right) choline Cl. (a) after green-LED excitation, (b) unphotolyzed state. Difference spectra are obtained as  $(a) - (b) \times f$  with  $f$  being the scaling factor, and shown in blue.



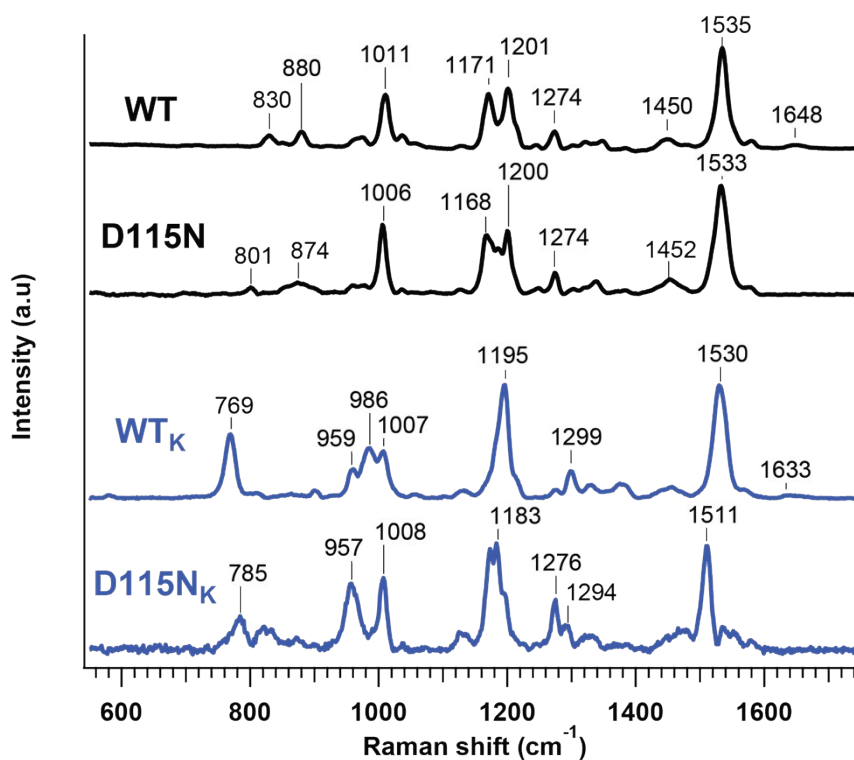

**Figure S8.** Raman spectra of D115N mutant of *IaNaR* in the presence of NaCl. Black: unphotolyzed state, blue: K intermediate. The spectra of wild-type *IaNaR* (WT) and the K intermediate (WT<sub>K</sub>) are shown for comparison.

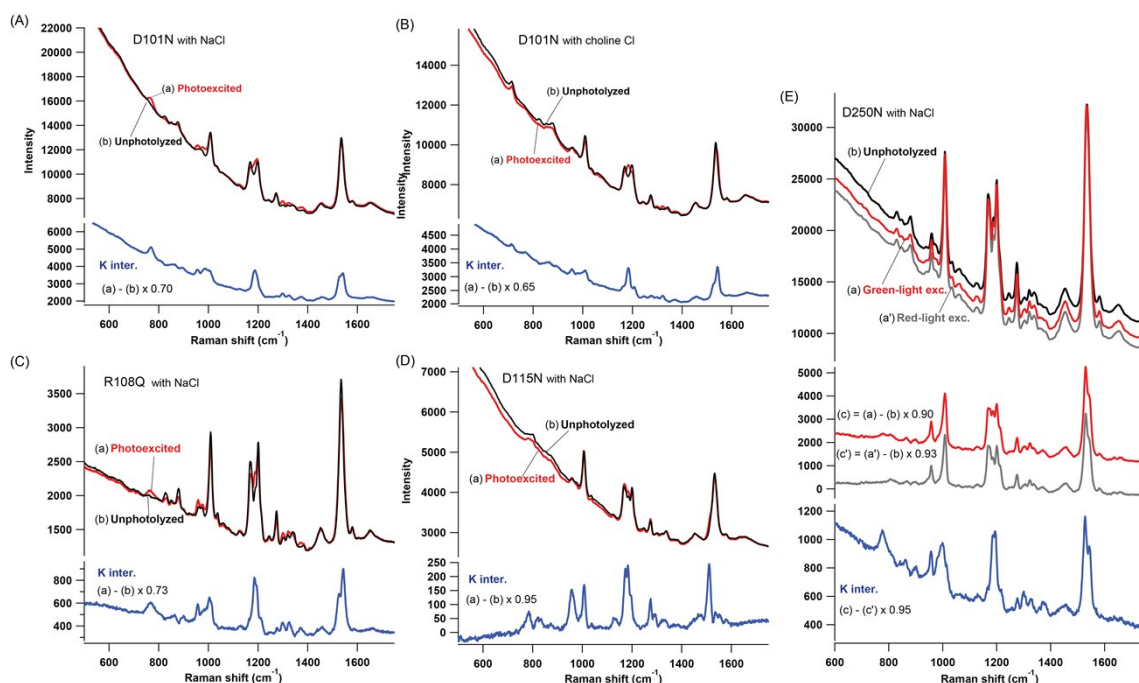

**Figure S9.** Raman spectra of (A) D101N with NaCl, (B) D101N with choline Cl, (C) R108Q with NaCl, (D) D115N with NaCl, and (E) D250N with NaCl, at 80K. For A-D, (a) spectra after photoexcitation by green-light excitation and (b) spectra of unphotolyzed states are shown in red and black, respectively. The spectra of K intermediates are obtained as  $(a) - (b) \times f$  with  $f$  being the scaling factor, and shown in blue. For E, (a) spectrum after photoexcitation by green-light excitation and (a') spectrum after subsequent red-light excitation are shown in red and grey, respectively. The spectra of photoproducts produced by green light and red light are obtained as  $(c) = (a) - (b) \times 0.90$  and  $(c') = (a') - (b) \times 0.93$ , respectively. The spectrum of K intermediate is obtained as  $(c) - (c') \times 0.95$  with  $f$  being the scaling factor, and shown in blue.

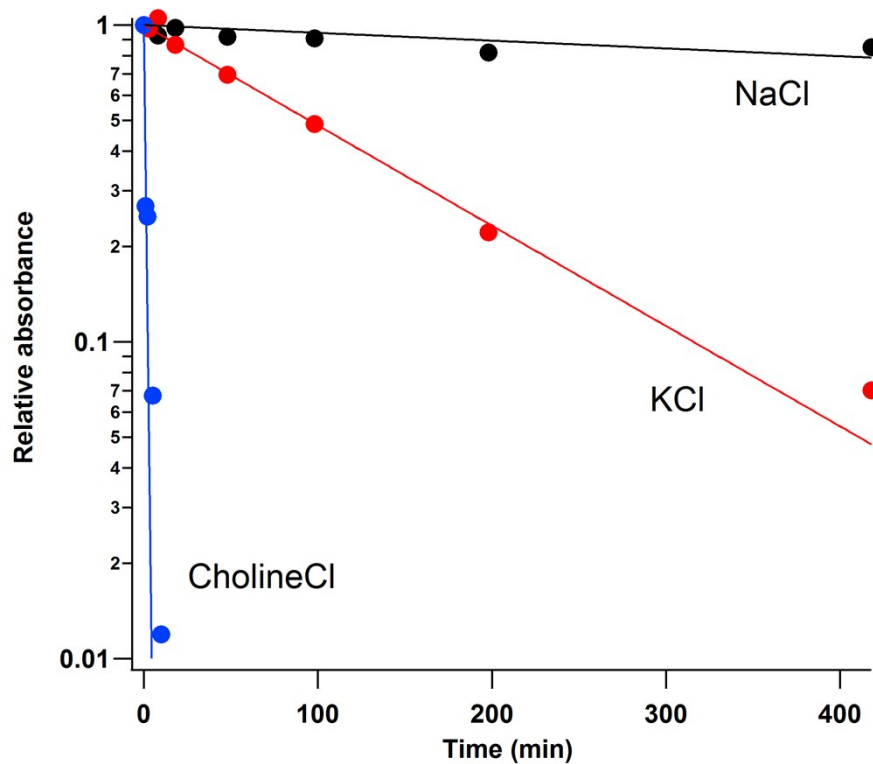

**Figure S10.** Thermal stability measurement of the detergent-solubilized *IaNaR* in the presence of NaCl (1.4 M), KCl (1.4 M), and choline Cl (0.4 M). The thermal bleaching of absorption band at 348 K is plotted as a function of time. The time constants of thermal bleaching are 1800 min, 137 min, and 1 min in the presence of NaCl, KCl, and choline Cl, respectively.
